# Repeated Exposure to Ketamine–Xylazine during Early Development Impairs Motor Learning–dependent Dendritic Spine Plasticity in Adulthood

Lianyan Huang, Ph.D., Guang Yang, Ph.D.

## ABSTRACT

**Background:** Recent studies in rodents suggest that repeated and prolonged anesthetic exposure at early stages of development leads to cognitive and behavioral impairments later in life. However, the underlying mechanism remains unknown. In this study, we tested whether exposure to general anesthesia during early development will disrupt the maturation of synaptic circuits and compromise learning-related synaptic plasticity later in life.

**Methods:** Mice received ketamine–xylazine (20/3 mg/kg) anesthesia for one or three times, starting at either early (postnatal day 14 [P14]) or late (P21) stages of development (n = 105). Control mice received saline injections (n = 34). At P30, mice were subjected to rotarod motor training and fear conditioning. Motor learning–induced synaptic remodeling was examined *in vivo* by repeatedly imaging fluorescently labeled postsynaptic dendritic spines in the primary motor cortex before and after training using two-photon microscopy.

**Results:** Three exposures to ketamine–xylazine anesthesia between P14 and P18 impair the animals' motor learning and learning-dependent dendritic spine plasticity (new spine formation,  $8.4 \pm 1.3\%$  [mean  $\pm$  SD] *vs.*  $13.4 \pm 1.8\%$ ,  $P = 0.002$ ) without affecting fear memory and cell apoptosis. One exposure at P14 or three exposures between P21 and P25 has no effects on the animals' motor learning or spine plasticity. Finally, enriched motor experience ameliorates anesthesia-induced motor learning impairment and synaptic deficits.

**Conclusions:** Our study demonstrates that repeated exposures to ketamine–xylazine during early development impair motor learning and learning-dependent dendritic spine plasticity later in life. The reduction in synaptic structural plasticity may underlie anesthesia-induced behavioral impairment. (**ANESTHESIOLOGY 2015; 122:821-31**)

IN recent years, there has been a growing concern about the safety of anesthetics on the developing brain. Emerging clinical evidence suggests that receiving multiple anesthetic exposures early in life may be a significant risk factor for the children to develop learning disabilities, attention-deficit, and hyperactivity disorders.<sup>1-4</sup> In line with these findings, animal studies have shown that early exposure to clinically used general anesthetics causes long-term learning and cognitive impairment in rodents and nonhuman primates.<sup>5-14</sup>

It has been shown that prolonged exposure to general anesthetics during the first postnatal week leads to neuronal apoptosis in rodents.<sup>5-11,15</sup> In rhesus monkeys, exposure to ketamine at postnatal days (P) 5 to 6, also causes significant neuronal cell death.<sup>16,17</sup> These studies suggest that anesthesia-induced neuronal apoptosis in the developing brain could be an important contributing factor to behavioral and cognitive impairment later in life. However, because anesthesia-induced neuronal apoptosis seems to be restricted to neonatal stages of the development (before P10),<sup>18</sup> it remains unclear whether anesthesia, when administered beyond the window of vulnerability to apoptosis (after P10), can also

### What We Already Know about This Topic

- Early exposure to general anesthesia can produce learning deficits and apoptosis of brain cells in animal models
- The effects of early anesthetic exposure on synaptic plasticity and learning in adulthood are unclear

### What This Article Tells Us That Is New

- Early multiple exposures to ketamine–xylazine, a veterinary anesthetic combination, resulted in impaired motor learning and learning-dependent spine plasticity in motor cortex, both of which could be prevented by an enriched environment
- Further studies are necessary to determine whether early exposure to more clinically relevant anesthetics has similar effects on learning and synaptic plasticity

result in behavioral impairments through mechanisms unrelated to cell death.

Many lines of evidence indicate that experience-induced synaptic plasticity is important for learning and memory formation.<sup>19-21</sup> It has been shown that motor skill learning and fear extinction induce rapid formation of dendritic spines, the postsynaptic sites of excitatory synapses, in the motor and frontal associative cortices, respectively.<sup>22-26</sup>

Presented, in part, at the annual meeting of American Society of Anesthesiologists, October 10–12, 2013, San Francisco, California.

Submitted for publication May 16, 2014. Accepted for publication December 9, 2014. From the Department of Anesthesiology, New York University Medical Center, New York, New York.

Copyright © 2015, the American Society of Anesthesiologists, Inc. Wolters Kluwer Health, Inc. All Rights Reserved. Anesthesiology 2015; 122:821-31

Furthermore, the degree of persistent new spines induced by learning strongly correlates with the performance improvement after training.<sup>22–24,26</sup> These findings raise the possibility that learning-dependent synaptic plasticity may be impaired in mice receiving multiple anesthesia early during development and that such deficits may underlie behavioral and cognitive deficits later in life.

To test this hypothesis, we examined synaptic structural plasticity during motor skill learning in the young adult mice with or without anesthesia during different stages of development. This was achieved by longitudinally following the same dendritic segments in the motor cortex of living mice with a transcranial two-photon imaging technique.<sup>27</sup> Ketamine is a widely used agent for pediatric procedural sedation. In rodent models, ketamine–xylazine (K/X) combination is the most widely used anesthetics and is therefore chosen to induce anesthesia in this study. Our results show that three K/X (20/3 mg/kg) exposures at early (P14 to P18) but not late stages (P21 to P25) of brain development impair the animals' motor learning ability later in life without inducing neuronal apoptosis. Motor learning–associated dendritic spine remodeling is significantly reduced in young adult mice after repeated exposure to K/X anesthesia at P14 to P18. In addition, we found that enriched motor experience following exposure to K/X anesthesia enhances motor learning–induced spine remodeling and improves animals' behavioral performance later in life.

## Materials and Methods

### Experimental Animals and Anesthetic Treatment

The animal protocol was approved by Institutional Animal Care and Use Committee at New York University Medical Center (New York, New York). Mice expressing yellow fluorescent protein in layer 5 pyramidal neurons (*Thy1-YFP* H-line) were purchased from the Jackson Laboratory (Bar Harbor, ME) and group-housed in the Skirball animal facilities. A total of 143 mice were randomly assigned to different treatment groups as listed in table 1. Both male and female mice were used, and no mice were lost to attrition during the experiment. The group size was determined based on our previous studies using the same methodology.<sup>22,28</sup> There were two single-exposure groups and two multiple-exposure groups. The single-exposure groups received one intraperitoneal injection of K/X (20/3 mg/kg) either on P14 or on P21. The multiple-exposure groups received one injection of K/X (20/3 mg/kg) every 2 days for a total of three injections, which took place either on P14, P16, and P18 or on P21, P23, and P25. Control group received saline injections. We found that one injection of K/X (20/3 mg/kg) produces a light surgical level of anesthesia. About 20% of our mice showed reaction to physical stimulation 30 min after injection, and 80% of mice showed voluntary movement within 1 h. During anesthesia, a heating pad was used to maintain the animal's body

temperature at approximately 37°C. In a separate group of animals, blood gas analysis was performed with handheld i-STAT system (Abbott Point of Care, Princeton, NJ). In agreement with our previous observations,<sup>28</sup> we confirmed that 1 h of K/X anesthesia did not induce significant alteration in blood gas values including pH and partial pressure of oxygen and carbon dioxide. In addition, a group of P7 mice were exposed to a higher dose of K/X (40/4 mg/kg) for 6 h and used as positive controls for assessment of apoptosis by immunohistochemistry.

### Rotarod Training

Animals were subjected to rotarod training for 2 days using a protocol described previously.<sup>22</sup> An EZRod system with a test chamber (Omnitech Electronics, Columbus, OH) was used to perform the rotarod training. After animals were placed on the motorized rod in the chamber, the rotation speed of the rod increased gradually from 0 to 100 r.p.m. over the course of 3 min. The time latency and rotation speed were recorded when the animal was unable to keep up with the increasing speed and fell. Rotarod training or testing was performed in one 30-min session (20 trials per session) per day. Performance was measured as the average speed that the animals achieved during the 20 trials. Both control and experimental groups were trained daily from P30 to P32 to assess motor skill acquisition and further tested on P37 to examine motor skill retention.

### Cued and Contextual Fear Conditioning

Fear conditioning was performed in a FreezeFrame fear conditioning system (Coulbourn Instruments, Whitehall, PA). Mice were placed in a cleaned chamber for 2 min before they were presented with an auditory cue (a 400-Hz, 80-dB tone) for 30 s. A mild foot shock (0.5 mA) was administered during the last 2 s of the tone presentation and coterminated with the tone. A total of three trials were repeated with a 60- to 210-s intertrial interval on the training day. The next day, contextual fear memory was tested by returning mice to the same chamber for 5 min without applying the shock. Contextual fear memory was measured by the percent of time that the animals spent on freezing in response to representation of the context. Auditory-cued fear memory was tested by placing mice to a different chamber and presenting the auditory cue. Fear memory was measured by the percent of time that the animals spent on freezing during the tone presentation.

### Immunohistochemistry

Four groups of mice were used for immunohistochemistry studies (table 1). Mice were anesthetized with K/X (100/15 mg/kg) and immediately perfused with 20-ml phosphate buffered saline (PBS). Brain tissue was removed and fixed for 1 h in 4% paraformaldehyde at 4°C. Tissue was rinsed three times with PBS, embedded in 2% agarose, and sectioned at 100  $\mu$ m with a vibratome. Sections

**Table 1.** Experimental Groups

| Groups                                          | Treatments before P30 (K/X: 20/3mg/kg)                   | No. Mice Treated          | Experiments (P30 Except for Immunohistochemistry)                                                                                                                                         |
|-------------------------------------------------|----------------------------------------------------------|---------------------------|-------------------------------------------------------------------------------------------------------------------------------------------------------------------------------------------|
| K/X (P14)                                       | 1 K/X injection on P14                                   | 10 (5 males, 5 females)   | Rotarod (n = 10)                                                                                                                                                                          |
| K/X (P21)                                       | 1 K/X injection on P21                                   | 10 (6 males, 4 females)   | Rotarod (n = 10)                                                                                                                                                                          |
| K/X (P14, P16, and P18)                         | 3 K/X injections between P14 and P18                     | 33 (18 males, 15 females) | Rotarod (n = 10)<br>Fear conditioning (n = 10)<br>Immunohistochemistry (n = 4)<br><i>In vivo</i> imaging with no training (n = 4)<br><i>In vivo</i> imaging with rotarod training (n = 5) |
| K/X (P21, P23, and P25)                         | 3 K/X injections between P21 and P25                     | 34 (18 males, 16 females) | Rotarod (n = 10)<br>Fear conditioning (n = 10)<br>Immunohistochemistry (n = 4)<br><i>In vivo</i> imaging with no training (n = 5)<br><i>In vivo</i> imaging with rotarod training (n = 5) |
| Control                                         | Saline                                                   | 34 (20 males, 14 females) | Rotarod (n = 10)<br>Fear conditioning (n = 10)<br>Immunohistochemistry (n = 4)<br><i>In vivo</i> imaging with no training (n = 5)<br><i>In vivo</i> imaging with rotarod training (n = 5) |
| K/X (P14, P16, and P18) + EE                    | 3 K/X injections between P14 and P18; EE from P18 to P28 | 18 (7 males, 11 females)  | Rotarod (n = 10)<br><i>In vivo</i> imaging with no training (n = 4)<br><i>In vivo</i> imaging with rotarod training (n = 4)                                                               |
| Positive control for cleaved caspase-3 staining | P7; 6-h anesthesia maintained by 40/4mg/kg K/X           | 4 (2 males, 2 females)    | Immunohistochemistry (n = 4)                                                                                                                                                              |

EE = enriched environment; K/X = ketamine–xylazine.

were permeabilized in 1% Titron X-100 in PBS for 3 h and blocked with 5% normal goat serum for 1 h. Sections were incubated overnight with primary antibodies against cleaved caspase-3 (1:200). Sections were then washed three times with PBS/0.05% Tween-20 and then incubated with Alexa Fluor-conjugated goat anti-rabbit immunoglobulin G secondary antibodies (1:500) in PBS for 2 h and again washed with washing buffer. The nuclei were stained with 0.5  $\mu\text{g}/\text{ml}$  4',6'-diamidino-2-phenylindole for 5 min. Sections were washed as before and mounted for imaging. Confocal images were obtained on a Biorad Radiance 2000 confocal microscope (Hercules, CA). Investigators were blinded to experimental condition in the process of imaging and data analysis.

### In Vivo Transcranial Two-photon Imaging and Data Analysis

The procedure for chronic imaging of neuronal structure in the living cortex has been described in our previous work.<sup>27,28</sup> Briefly, surgical anesthesia in P30 mice was achieved using an intraperitoneal injection of K/X (100/15 mg/kg). A midline scalp incision exposed the skull, and the area to be imaged was identified based on stereotaxic coordinates for the primary motor cortex. The head was immobilized, and a cranial window was created by thinning a circular area of the skull (~200  $\mu\text{m}$  in diameter) to approximately 20  $\mu\text{m}$  in thickness by using a high-speed drill and a microsurgical blade. Upon completion of the skull thinning under a dissection microscope, the animal was placed under a multiphoton microscope while still

in anesthesia. Image stacks of dendritic segments within a depth of 100  $\mu\text{m}$  from the pial surface were collected using a 60 $\times$  objective (NA 1.1) immersed in artificial cerebrospinal fluid. High-magnification (66.7  $\times$  66.7  $\mu\text{m}$ ; 512  $\times$  512 pixels; 0.75  $\mu\text{m}$  step) imaging was used to obtain images suitable for spine analysis. After imaging, the scalp was sutured with 6-0 silk, and the animal was returned to the home cage until the next viewing.

Analysis of spine plasticity was performed using the NIH ImageJ software (Bethesda, MD) as described previously.<sup>22,29</sup> Briefly, for each dendritic segment, filopodia were identified as long, thin protrusions without enlarged heads, and the remaining protrusions were classified as spines. Images of the same dendritic segments identified from two views were compared. Spines were considered stable if they were present in both views, eliminated if they were present in the first view but not in the second view, or newly formed if they were present in the second view but not in the first view. The elimination and formation rates were measured as the number of spines eliminated or formed in the second view divided by the number of spines existing in the first view. Investigators were blinded to experimental condition when performing data analysis.

### Enriched Environment

A group of mice were housed in a special cage (36.5  $\times$  20.7  $\times$  14 cm) containing a running wheel from P18 to P28, where they have *ad libitum* access to food, water, and a freely rotating running wheel. The running wheel was used

to enrich the animals' living environment and increase their voluntary exercise activity.

### Statistical Analysis

Data were presented as mean  $\pm$  SD unless otherwise indicated. Group differences in behavioral performance, immunohistochemistry, dendritic spine density, and the percentage of filopodia were determined using a one-way ANOVA followed by Neuman–Keuls multiple comparison *post hoc* test. In analysis of spine head diameters, comparisons of the means of each group were performed using a two-way ANOVA with repeated measures. A two-tailed unpaired Student *t* test was used to determine the difference between K/X- and saline-treated groups in the rates of dendritic spine formation and elimination. *P* value of less than 0.05 was considered statistically significant. Prism software (GraphPad 6.0, La Jolla, CA) was used to analyze the data.

## Results

### Multiple Exposures to K/X during P14 to P18 Cause Motor Learning Deficits in Mice at P30

To investigate whether and when exposures to anesthesia during development cause learning impairment in later life, we treated mice with K/X (20/3 mg/kg) anesthesia for one or three times during the second or third week of postnatal life (fig. 1A) (table 1). Control mice received saline injections. From P30 to P32, all groups of mice were trained to run on a rotating rod. During this rotarod running task, the animals change their gait pattern to maintain their balance on the accelerating rod.<sup>30</sup> On the first training day (P30), both saline- and K/X-injected mice showed similar running performance ( $F [4, 45] = 0.629, P = 0.644$ , one-way ANOVA) (fig. 1B) and task participation ( $F [4, 45] = 0.654, P = 0.627$ , one-way ANOVA) (fig. 1C), suggesting that exposure to K/X during early developmental stages has no significant effects on the animals' basic motor function. After 2-day training, all mice improved their performance on the task at P32. One injection of K/X on P14 or P21 or three injections of K/X during P21 to P25 had no significant effect on the animals' performance improvement after motor training as compared with saline-injected control mice ( $P = 0.690$ ) (fig. 1D). Notably, we found that mice receiving three injections of K/X during P14 to P18 showed significant reduction in performance improvement as compared with the control ( $P < 0.0001$ ) (fig. 1D). When the mice were retested with the same task 5 days later (P37), the performance of mice exposed to K/X at P14 to P18 remained significantly lower than saline controls ( $P < 0.0001$ ) (fig. 1E). Together, these findings suggest that multiple exposures to K/X during the early postnatal development lead to motor learning deficits later in life.

To determine if multiple exposures to K/X anesthesia affect behaviors other than motor learning, we performed

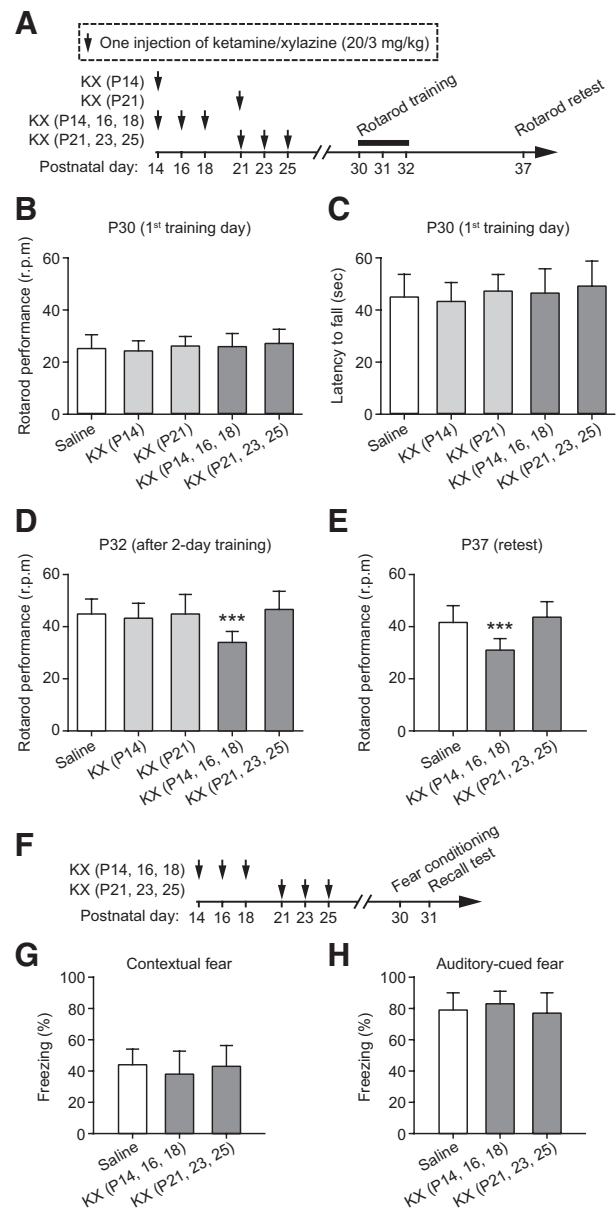

**Fig. 1.** Impaired motor skill learning in 1-month-old mice with three ketamine–xylazine (KX) exposures at P14 to P18. (A) Experimental design. Animals received a single or three injections of KX starting at P14 or P21 and were subjected to rotarod training at P30 to P32 and testing at P37. (B, C) All groups of mice showed similar rotarod performance on the first training day. (D) After 2-day training, mice with three injections of KX at P14 to P18 showed significant lower performance than all other groups. (E) When retested on P37, mice with three injections of KX at P14 to P18 continually showed reduced performance than saline controls. (F) Animals received three injections of KX at P14 to P18 or P21 to P25 and were subjected to fear conditioning tests at P30. (G, H) Exposures to KX at P14 to P18 or P21 to P25 had no effects on the animals' contextual fear memory (G) and auditory-cued fear memory (H). Comparison of means of each group was performed using a one-way ANOVA followed by Neuman–Keuls multiple comparison *post hoc* test. Data are presented as mean  $\pm$  SD. \*\*\* $P < 0.001$ .

contextual and auditory-cued fear conditioning tests (fig. 1F). We found that mice with three injections of K/X at either P14 to P18 or P21 to P25 had similar freezing response as compared with control mice that received saline injections (contextual fear:  $F [2, 27] = 0.702, P = 0.504$ ; auditory-cued fear:  $F [2, 27] = 0.874, P = 0.429$ , one-way ANOVA) (fig. 1, G and H), indicating that neural circuits involved in fear learning may be resistant to the disruption caused by anesthesia at early stages. Taken together, these results indicate that K/X anesthesia has long-lasting adverse effects on the animals' behavioral performance on selected tasks, and the effects are age- and exposure frequency-dependent.

### No Increase of Cell Apoptosis after Multiple Exposures to K/X Starting at P14 or P21

Previous studies have shown a significant increase in cell apoptosis after prolonged exposure to anesthesia during the first week of postnatal development.<sup>5–11,15</sup> To test whether cell apoptosis might contribute to anesthesia-induced motor learning deficits, we examined whether the anesthesia regimen used in the current study might cause cell death in P14 and older mice. Cell apoptosis was assessed by the immunostaining of cleaved caspase-3 on the day when mice received the last injection of K/X (fig. 2A). We found that three injections of K/X at either P14 to P18 or P21 to P25 had no significant effect on cell apoptosis ( $P = 0.334$ , one-way ANOVA) (fig. 2B). As a positive control for detecting anesthesia-induced cell death, we also performed a 6-h-long anesthesia in P7 mice using a higher dose of K/X (40/4 mg/kg) (fig. 2A). Consistent with previous observations,<sup>31</sup> this anesthesia condition increased cell apoptosis ( $P < 0.0001$ , one-way ANOVA followed by Neuman–Keuls *post hoc* test)

(fig. 2B). These data indicate that repetitive exposures to low-dose K/X have no significant effects on neuronal death in P14 and older mice.

### Multiple Exposures to K/X Have No Effects on Dendritic Spine Density and Size in Adulthood

Previous study from fixed brain preparations has shown that ketamine anesthesia causes rapid and significant changes in dendritic spine density and size in various brain regions during early postnatal development.<sup>32</sup> To determine whether repeated exposure to K/X anesthesia may have long-lasting effects on dendritic spine development, we measured the density and size of dendritic spines in P30 mice that received three injections of K/X during either P14 to P18 or P21 to P25 (fig. 3). Transgenic mice expressing cytoplasmic yellow fluorescent protein in a subpopulation of layer 5 pyramidal neurons were used in this study<sup>33</sup> (fig. 3A). At P30, dendritic spine density on apical tuft dendrites was  $0.58 \pm 0.15 \mu\text{m}^{-1}$  (500 spines, five mice) and  $0.57 \pm 0.13 \mu\text{m}^{-1}$  (500 spines, five mice), respectively, in the primary motor cortex of mice that received three injections of K/X at P14 to P18 or P21 to P25. There was no significant difference in spine density between K/X- and saline-treated mice ( $0.55 \pm 0.08 \text{ spines } \mu\text{m}^{-1}$ , 500 spines, five mice;  $P = 0.956$ , one-way ANOVA) (fig. 3B). In addition, analysis of spine head diameters revealed no significant difference between K/X-treated mice and the control ( $P > 0.9999$ , two-way ANOVA with repeated measures) (fig. 3C). The percentage of dendritic filopodia, the precursors of dendritic spines, was also not different among all groups ( $P = 0.879$ , one-way ANOVA) (fig. 3D). These results indicate that repeated exposure to low-dose K/X after P14 does not lead to significant alterations in the density and size of synaptic connections later in life.

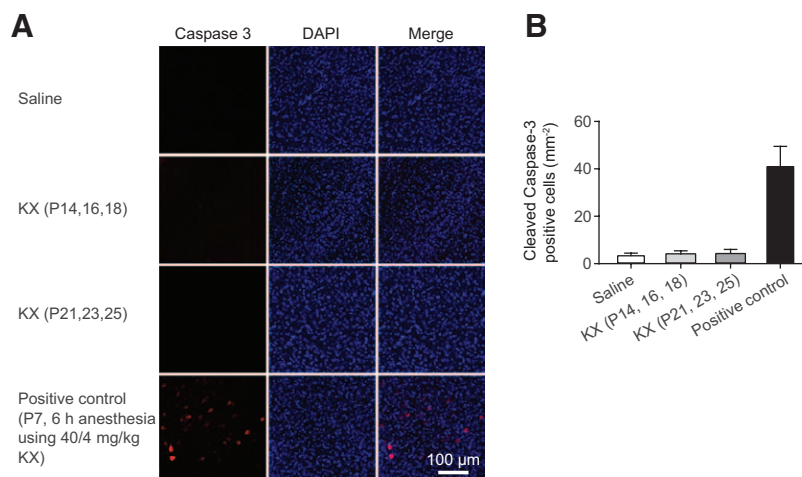

**Fig. 2.** No cell death is detected in the motor cortex after three injections of ketamine–xylazine (KX). (A) Cell apoptosis in the motor cortex was assessed by the immunostaining of cleaved caspase-3 on the day when the mice received the last injection of KX (20/3 mg/kg). Nucleic acid was stained with 4',6'-diamidino-2-phenylindole (DAPI). Saline injection was used as control group. A 6-h-long anesthesia maintained by a higher dose of KX (40/4 mg/kg) in P7 mice was used as a positive control group. Three injections of KX at either P14 to P18 or P21 to P25 had no significant effect on cell apoptosis. Scale bar, 100  $\mu\text{m}$ . (B) Quantification of cleaved caspase-3 positive cell number under various conditions. Comparison of means of each group was performed using a one-way ANOVA followed by Neuman–Keuls multiple comparison *post hoc* test. Data are presented as mean  $\pm$  SD.

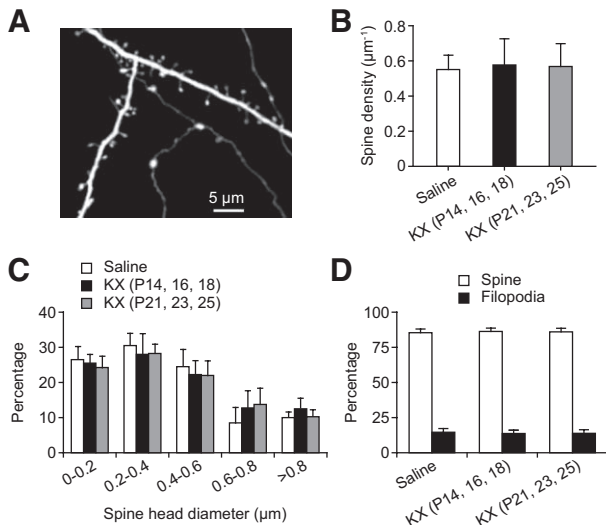

**Fig. 3.** No change in the density and size of dendritic spines in P30 mice after early ketamine–xylazine (KX) injections. (A) *In vivo* transcranial two-photon imaging of dendritic branches in the motor cortex of P30 mice. Scale bar, 5  $\mu$ m. (B) Density of dendritic spines on the apical tuft dendrites of layer 5 pyramidal neurons from saline- and KX-injected mice. There was no significant difference between saline- and KX-injected groups. Comparison of means of each group was performed using a one-way ANOVA. (C) Frequency distribution histogram of spine head diameter shows that the KX treatment had no significant effect on spine head size. Comparison of means of each group was performed using a two-way ANOVA with repeated measures. (D) Percentage of dendritic filopodia was similar in mice with or without early KX injections. Comparison of means of each group was performed using a one-way ANOVA. Data are presented as mean  $\pm$  SD.

### Multiple Exposures to K/X after P14 Have No Effects on Baseline Dynamics of Dendritic Spines at P30

Next, we asked whether baseline dynamics of dendritic spines were altered in mice that received three exposures to K/X anesthesia and housed under the standard laboratory housing condition. We repeatedly imaged apical dendritic branches and followed the formation and elimination of dendritic spines in the primary motor cortex using transcranial two-photon microscopy (fig. 4, A and B). Consistent with previous studies,<sup>22,24</sup> we found that a small percentage of dendritic spines were formed and eliminated over 2 days in 1-month-old mice (fig. 4, C and D). From P30 to P32,  $5.7 \pm 0.7\%$  dendritic spines were formed and  $6.4 \pm 0.5\%$  were eliminated in control mice (768 spines,  $n = 5$  mice). In mice that received three injections of K/X at P14 to P18 or P21 to P25, spine turnover over 2 days in the motor cortex was comparable to that in saline-treated controls ( $P = 0.632$  and  $P = 0.248$ ) (fig. 4, C and D). Spine formation and elimination rates over 2 days were  $6.3 \pm 0.3\%$  and  $7.0 \pm 0.4\%$ , respectively, in mice injected with K/X during P14 to P18 (617 spines,  $n = 4$  mice) and  $6.0 \pm 1.4\%$  and  $7.1 \pm 0.9\%$  in mice injected during P21 to P25 (775 spines,  $n = 5$  mice). These results indicate that the baseline dynamics

of dendritic spines are not altered after repeated exposure to K/X anesthesia.

### Motor Learning–induced Spine Formation Is Reduced in Mice Receiving Multiple Exposures of K/X at P14 to P18

Previous studies indicate that motor skill learning induces rapid formation of new dendritic spines.<sup>22–25</sup> Moreover, the extent of dendritic spine remodeling strongly correlates with behavioral improvement after learning, suggesting that the remodeling of synaptic connections has an important role in learning and memory formation.<sup>22,24</sup> Because multiple exposures to K/X anesthesia during early development result in motor learning deficits later in life (fig. 1), it is possible that learning-dependent remodeling of synaptic connections is reduced in animals that have been exposed to general anesthetics during early development.

To test this hypothesis, we examined motor learning-dependent spine remodeling in P30 mice that have received three K/X injections at either P14 to P18 or P21 to P25 (fig. 4). All mice were trained on the rotarod for 2 days starting at P30. Dendritic spines in the primary motor cortex were imaged before and after rotarod learning to determine learning-induced spine formation and elimination in different groups (fig. 4A). Consistent with our previous findings,<sup>22,25</sup> we found that in saline-injected control mice, rotarod training over 2 days significantly increased the formation of new spines in the motor cortex ( $13.4 \pm 1.8\%$ ; 687 spines, 5 mice;  $P = 0.0003$ ; Student  $t$  test) (fig. 4, B and C). Motor training also induced significant increases in spine formation in K/X-injected mice as compared with mice with no training ( $P = 0.02$  for P14 to P18 injection group;  $P = 0.001$  for P21 to P25 injection group) (fig. 4C). However, the degree of learning-induced spine formation was significantly lower in mice with three K/X injections at P14 to P18 ( $8.4 \pm 1.3\%$ ; 760 spines, five mice) as compared with that in control mice ( $P = 0.002$ ) (fig. 4C). Because 2-day training had no significant effects on dendritic spine elimination in both saline- and K/X-injected mice ( $P = 0.965$ ) (fig. 4D), motor learning–induced increase in total spine number was reduced in mice that received K/X injections at P14 to P18 as compared with saline controls ( $P = 0.007$ ) (fig. 4E). Taken together, these results indicate that motor learning–induced spine remodeling is compromised in young adult mice that have received repetitive K/X anesthesia during early developmental stages.

### Enriched Motor Experience Attenuates K/X Anesthesia–induced Deficits in Motor Learning and Learning–dependent Spine Remodeling

Previous studies have shown that enriched environment (EE) can accelerate synapse development and promote dendritic spine plasticity in the cortex.<sup>22,34</sup> To test whether EE is beneficial for learning-induced spine remodeling and motor performance in mice following anesthetic exposure, we placed mice in a special cage where they have access to a freely

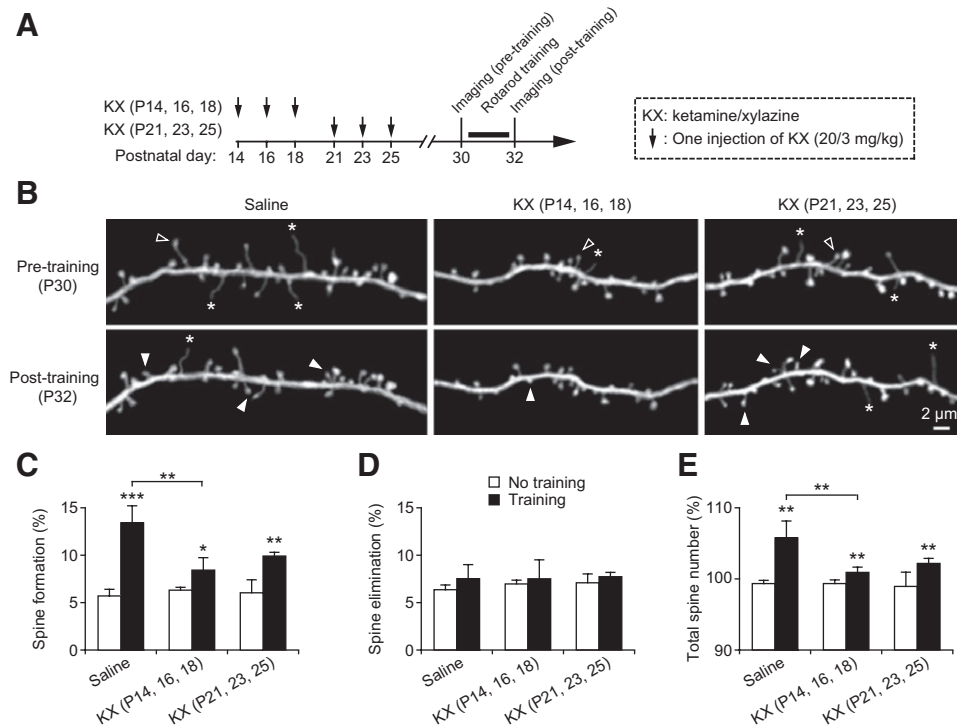

**Fig. 4.** Reduction of motor learning-induced spine formation after multiple exposures to ketamine-xylazine (KX) at P14 to P18. (A) Experimental design. (B) *In vivo* time-lapse imaging of the same dendritic segments over 2 days (pre- and posttraining) in the primary motor cortex of 1-month-old animals that received saline or KX injections at various ages. Filled and empty arrowheads indicate dendritic spines that were formed and eliminated between the two views. Asterisks indicate dendritic filopodia. Scale bar, 2  $\mu$ m. (C) Percentage of dendritic spines formed over 2 days in saline- and KX-treated mice. All groups showed significant increase in spine formation after rotarod training. Motor learning-induced increase in spine formation was significantly lower in mice that received three injections of KX at P14 to P18 as compared with saline-injected mice. (D) Percentage of spines eliminated over 2 days in saline- and KX-treated mice. There was no significant difference between saline- and KX-treated groups. (E) The total number of spines increased over 2-day motor training in all groups. Motor learning-induced increase in total spine number was significantly reduced in mice with three KX injections during P14 to P18 as compared with saline-injected mice. Comparisons of means of KX-treated group relative to saline-treated group were carried out using two-tailed unpaired Student *t* tests. Data are presented as mean  $\pm$  SD. \* $P < 0.05$ . \*\* $P < 0.01$ . \*\*\* $P < 0.001$ .

rotating wheel for 10 days (from P18 to P28). Specifically, we asked whether wheel-running activity in early postnatal life can enhance both learning-induced spine remodeling and rotarod performance in K/X-treated mice to the levels comparable to those in saline-treated controls.

After receiving three injections of K/X from P14 to P18, mice were housed in the cage where mice could run on a rotating wheel voluntarily over 10 days. We then tested their performance on the rotarod task from P30 to P32 (fig. 5A). As shown in figure 5B, all groups of mice showed similar rotarod performance on the first day of training ( $F[2, 27] = 0.082$ ,  $P = 0.921$ , one-way ANOVA). After 2-day training, the rotarod performance in mice with wheel-running activity after K/X injections was comparable to that in saline-treated controls ( $P = 0.784$ , one-way ANOVA) and significantly better than mice with K/X treatments alone ( $P < 0.0001$ , one-way ANOVA followed by Neuman-Keuls *post hoc* test) (fig. 5B). Furthermore, we found that wheel running significantly increased rotarod learning-induced spine formation over 2 days in K/X-injected mice ( $12.8 \pm 1.1\%$ ; 579 spines,

four mice;  $P = 0.019$ ) (fig. 5C). No significant difference in spine elimination ( $P = 0.503$ ) (fig. 5D) and total spine number ( $P = 0.478$ ) (fig. 5E) was found between control mice and mice that were housed in EE after early K/X exposure. Thus, enriched motor experience effectively increased both learning-induced spine remodeling and motor performance in mice with early exposure to K/X anesthesia.

## Discussion

Recent studies in rodents and monkeys suggest that exposure to anesthesia during early postnatal development results in learning and behavioral abnormalities later in life. However, the mechanisms underlying anesthesia-induced learning impairments remain unclear. In this study, we report that three exposures to K/X (20/3 mg/kg) anesthesia in the second week (P14 to P18), but not the third week (P21 to P25) of postnatal development, cause motor learning deficit in mice. We find that cell apoptosis, dendritic spine density, and size are not altered in K/X-exposed mice. However, motor training-induced formation of new spines is significantly

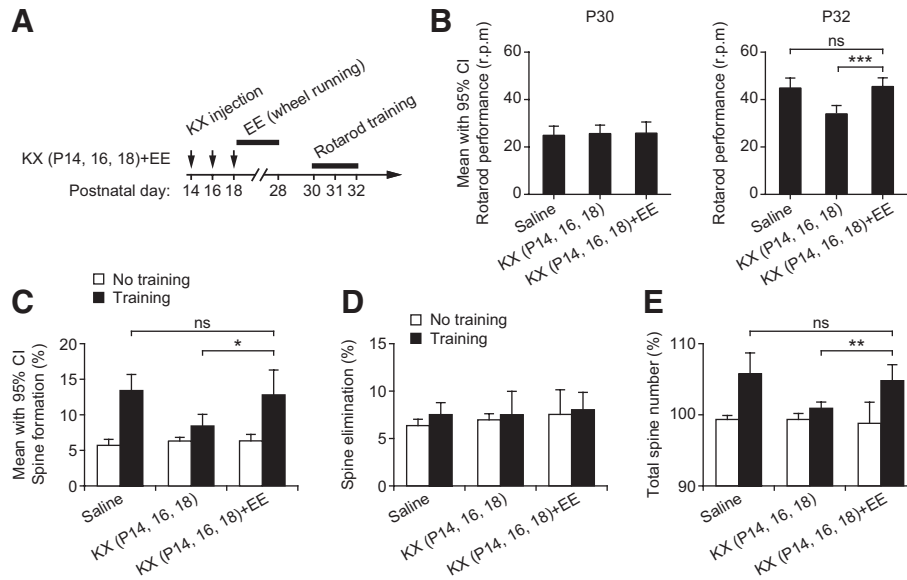

**Fig. 5.** Enriched motor experience ameliorates motor learning and synaptic deficits in mice receiving multiple ketamine–xylazine (KX) exposures. (A) Experimental design. Mice received three injections of KX during P14 to P18 and were then housed in enriched environment (EE) where they had access to a freely rotating wheel for 10 days. Motor performance on the rotarod task was examined from P30 to P32. (B) Rotarod performance in saline- and KX-treated mice. Rotarod performance was similar in all three groups in the first training session at P30. After 2-day training, rotarod performance was significantly higher in the KX group with voluntary running activity than without. Comparisons were performed using a one-way ANOVA followed by Neuman–Keuls multiple comparison *post hoc* test. (C) Percentage of newly formed dendritic spines from P30 to P32. EE following KX exposure ameliorated anesthesia-induced deficits in spine formation after motor training. Comparisons were carried out using a two-tailed unpaired Student *t* test. (D) Percentage of spines eliminated from P30 to P32. There was no significant difference in spine elimination among all groups of animals. Comparisons were performed using a two-tailed unpaired Student *t* test. (E) Motor learning–induced increase in total spine number was comparable between saline-injected control mice and mice housed in EE after early KX exposure. Comparisons were carried out using a two-tailed unpaired Student *t* test. Data are presented as mean with 95% CIs. \**P* < 0.05. \*\**P* < 0.01. \*\*\**P* < 0.001.

reduced. Enriched motor experience for 10 days following the initial K/X exposure rescues motor learning and synaptic deficits in adulthood. Together, our results reveal that multiple exposures to anesthesia in developing brain can cause long-lasting impairment of synaptic plasticity, which could be reversed with appropriate behavioral intervention.

Ketamine is a dissociative anesthetic and primarily blocks *N*-methyl-D-aspartic acid (NMDA) receptors.<sup>35</sup> In rodents, ketamine is frequently used together with the  $\alpha$ 2-adrenoreceptor agonist xylazine to enhance sedative effects and decrease the ketamine dose. Notably, although a single exposure to K/X anesthesia at P14 has no long-lasting effects on the animals' motor and fear learning, three rounds of K/X anesthesia, which is spaced every other day between P14 and P18, produce motor learning deficit in young adult mice. One or three K/X anesthetics during P21 to P25 have no significant effects on the animals' behavioral performance at 1 month of age. These results imply that anesthesia, when administered during early postnatal age for multiple times, has accumulative impacts on the developing brain and leads to behavioral impairment later in the life. These results are consistent with a recent study reporting that anesthesia with 3% sevoflurane for 2 h in P6 mice does not induce cognitive impairment, whereas anesthesia with 3% sevoflurane for 2 h

daily for 3 days induce cognitive impairment detected at 1 month of age.<sup>14</sup>

Previous studies have linked anesthesia-induced cell death to animals' behavioral impairment later in life.<sup>5–7</sup> Several anesthetic agents that act as NMDA receptor antagonists and/or  $\gamma$ -aminobutyric acid type A receptor agonists can induce extensive neuronal apoptosis in the developing brain in an age-dependent manner.<sup>5–7,15,16,18</sup> The window of vulnerability to the neurotoxicity of ketamine is restricted to late fetal and early postnatal ages (before P10 in rodents).<sup>18</sup> Consistent with these studies, our results show that exposure to K/X anesthesia after P14 has no significant effect on cell apoptosis. The fact that these mice show motor learning impairment at P30 suggests that apoptotic cell death is unlikely the major pathological event underlying anesthesia-induced cognitive impairment. Instead, abnormal development and plasticity of synaptic connections may play an important role in anesthesia-induced behavioral deficits.

Exposure to general anesthetics during the peak stage of synaptogenesis has been shown to cause rapid and substantial alterations in the number of dendritic spines within hours.<sup>32,36–38</sup> Five hours of anesthesia with midazolam, propofol, or ketamine caused a substantial increase (up to two-fold) in the density of dendritic spines in the mouse



somatosensory cortex and hippocampus at P15 and P20.<sup>32</sup> A substantial increase (~30% to 50%) in dendritic spine density of layer five pyramidal cells was observed in rat medial prefrontal cortex within 2 h after exposure to isoflurane, sevoflurane, desflurane, or propofol at P15 or P20.<sup>36,38</sup> In the current study, dendritic spine density was examined at P30, 1 to 2 weeks after initial exposure to anesthesia at P14 or P21. We did not find significant changes in spine density or size in the primary motor cortex of mice that received three injections of K/X at either P14 to P18 or P21 to P25 as compared to saline-treated controls. Furthermore, the percentage of dendritic filopodia, the precursors of dendritic spines, is also comparable between mice with and without early K/X treatments. These observations indicate that multiple exposures to K/X anesthesia after P14 have no long-lasting effects on dendritic spine number and morphology in mouse motor cortex. It has been shown that propofol anesthesia-induced modification in dendritic spine density in the rat medial prefrontal cortex persists into adulthood.<sup>38</sup> Therefore, the effect of anesthesia on spine density likely depends on the type of anesthetic drugs and brain regions.

Consistent with previous studies,<sup>22,24,25</sup> we found that in both saline- and K/X-treated mice, rotarod training over 2 days increases the rate of dendritic spine formation in the primary motor cortex. However, the degree of learning-induced new spines was substantially lower in mice with multiple sessions of K/X anesthesia at P14 to P18. We also observed lower rates of spine formation after training in mice that received K/X anesthetics at P21 to P25, although the difference is not significant. The reduction of learning-dependent spine dynamics in adulthood indicates that multiple exposures to K/X anesthesia during early development have a long-lasting detrimental impact on neural circuits. Recent *in vivo* imaging studies have shown that the acquisition of a new motor skill is accompanied by new spine formation in the primary motor cortex,<sup>22–25</sup> and the persistence of motor learning-induced new spines correlates with the retention of the motor skill.<sup>22–24</sup> The reduced synaptic plasticity in response to rotarod motor learning might underlie the behavioral deficit in ketamine-treated mice.

The mechanisms by which anesthesia impairs learning-dependent synaptic plasticity remain to be determined. An important feature of the nervous system is that neuronal activity profoundly affects patterns of neuronal connectivity during development. Ketamine depresses neuronal activity and reduces calcium influx into neurons primarily through blockade of NMDA receptors.<sup>39–41</sup> NMDA receptor-mediated calcium influx is critical for neuronal differentiation, migration, and synaptogenesis.<sup>42</sup> Therefore, it is possible that ketamine-induced NMDA receptor inactivation could significantly reduce activity-mediated Ca<sup>2+</sup> influx into neurons, which in turn would affect synapse formation and plasticity.

It is well acknowledged that environmental stimulation has an important role in neural circuit formation and function.<sup>43–46</sup> Recent studies have shown that mice reared in the EE

for the first 2 weeks of postnatal development show accelerated synapse maturation, including increased levels of NMDA and  $\alpha$ -amino-3-hydroxy-5-methyl-4-isoxazolepropionic acid receptors and glutamatergic synaptic transmission as indicated by the increased amplitude of miniature and spontaneous excitatory postsynaptic currents.<sup>34</sup> It has been reported that EE alleviates sevoflurane anesthesia-induced behavioral deficits in fear conditioning and water maze tests.<sup>14,47</sup> We found that enriched motor experience in early life can ameliorate K/X anesthesia-induced decrease in dendritic spine plasticity associated with motor learning in the motor cortex. With the recovery of synaptic deficits in K/X-treated mice, motor learning deficits are also rescued. Our finding suggests that promoting synapse development after general anesthesia by EE is beneficial in preventing the long-lasting impact of general anesthetics on cortical function. It is important to point out that the current study focused on the effects of EE on motor learning and motor learning-dependent synaptic plasticity in the motor cortex after early K/X exposure. In the future, it will be of great interest to examine whether the effects of EE on synapse plasticity could be generalized to other brain regions and for other types of anesthetics.

It is important to point out several limitations in this study. First, surgical procedure for *in vivo* transcranial two-photon imaging may cause local inflammation and affect the dynamics of dendritic spines under the cranial window. Although our previous study has shown that carefully performed skull thinning does not activate microglia, the innate immune cells in the brain,<sup>27,48</sup> precaution must be taken to avoid over thinning or cracking the skull during the surgery. Second, we only examined the apoptosis and dendritic spine plasticity in the primary motor cortex of K/X-treated mice. In addition to the motor cortex, motor skill learning requires multiple brain regions, including the cerebellum, thalamus, and basal ganglia. Future studies on synaptic plasticity in these regions will be required to obtain a more comprehensive understanding of the effects of anesthetics on neuronal circuit development. Third, similar to most animal studies assessing the developmental toxicity of anesthetic drugs, caution is warranted in evaluating the clinical relevance of our findings with mouse models as the timeline of brain development is substantially different between human and mouse. Finally, it is important to note that we did not investigate the effects of ketamine exposure alone in the current study because doses of ketamine as high as 40 mg/kg are insufficient to produce anesthesia in young mice.<sup>31</sup> To avoid neurotoxicity associated with high dose of ketamine, we chose to use K/X mixture (20/3 mg/kg) which reliably induces anesthesia in young mice and provides immobilization for about 1 h. Because K/X combination is not used clinically, future studies are required to distinguish the contribution of ketamine in K/X anesthesia-induced synaptic and motor learning impairments.

In summary, we have found that repeated exposure to K/X anesthesia during the period of rapid synaptogenesis can cause behavioral deficits without triggering cell death.

Following early anesthetic exposure, cortical circuits are less responsive to the modulation by motor learning experience in adulthood, suggesting that the reduction in learning-dependent synaptic plasticity is an important cortical defect underlying anesthesia-induced cognitive impairments. Finally, enriched experience in early life is beneficial in mitigating the adverse effects of K/X anesthesia on brain function.

## Acknowledgments

The authors thank Thomas Blanck, M.D., Ph.D. (Department of Anesthesiology, New York University Medical Center, New York, New York), and members in Yang lab for their critical comments on the article.

Support was received from the National Institutes of Health, Bethesda, Maryland (grant no. R01 GM107469); Whitehall Foundation research grant, Palm Beach, Florida (to Dr. Yang); National Natural Science Foundation (grant no. 81001129), Beijing, China; Guangdong Natural Science Foundation (grant no. 10451051501004726), Guangdong, China; and Medical Scientific Research Foundation of Guangdong Province (grant no. B2010170), Guangdong, China (to Dr. Huang).

## Competing Interests

The authors declare no competing interests.

## Correspondence

Address correspondence to Dr. Yang: Department of Anesthesiology, New York University Medical Center, 550 First Avenue, New York, New York 10016. [guang.yang@med.nyu.edu](mailto:guang.yang@med.nyu.edu). Information on purchasing reprints may be found at [www.anesthesiology.org](http://www.anesthesiology.org) or on the masthead page at the beginning of this issue. ANESTHESIOLOGY's articles are made freely accessible to all readers, for personal use only, 6 months from the cover date of the issue.

## References

1. Wilder RT, Flick RP, Sprung J, Katusic SK, Barbaresi WJ, Mickelson C, Gleich SJ, Schroeder DR, Weaver AL, Warner DO: Early exposure to anesthesia and learning disabilities in a population-based birth cohort. *ANESTHESIOLOGY* 2009; 110:796–804
2. Flick RP, Katusic SK, Colligan RC, Wilder RT, Voigt RG, Olson MD, Sprung J, Weaver AL, Schroeder DR, Warner DO: Cognitive and behavioral outcomes after early exposure to anesthesia and surgery. *Pediatrics* 2011; 128:e1053–61
3. Sprung J, Flick RP, Katusic SK, Colligan RC, Barbaresi WJ, Bojanić K, Welch TL, Olson MD, Hanson AC, Schroeder DR, Wilder RT, Warner DO: Attention-deficit/hyperactivity disorder after early exposure to procedures requiring general anesthesia. *Mayo Clin Proc* 2012; 87:120–9
4. Ing C, DiMaggio C, Whitehouse A, Hegarty MK, Brady J, von Ungern-Sternberg BS, Davidson A, Wood AJ, Li G, Sun LS: Long-term differences in language and cognitive function after childhood exposure to anesthesia. *Pediatrics* 2012; 130:e476–85
5. Jevtovic-Todorovic V, Hartman RE, Izumi Y, Benshoff ND, Dikranian K, Zorumski CF, Olney JW, Wozniak DF: Early exposure to common anesthetic agents causes widespread neurodegeneration in the developing rat brain and persistent learning deficits. *J Neurosci* 2003; 23:876–82
6. Fredriksson A, Pontén E, Gordh T, Eriksson P: Neonatal exposure to a combination of N-methyl-D-aspartate and  $\gamma$ -aminobutyric acid type A receptor anesthetic agents potentiates apoptotic neurodegeneration and persistent behavioral deficits. *ANESTHESIOLOGY* 2007; 107:427–36
7. Bercker S, Bert B, Bittigau P, Felderhoff-Müser U, Bühner C, Ikonomidou C, Weise M, Kaisers UX, Kerner T: Neurodegeneration in newborn rats following propofol and sevoflurane anesthesia. *Neurotox Res* 2009; 16:140–7
8. Satomoto M, Satoh Y, Terui K, Miyao H, Takishima K, Ito M, Imaki J: Neonatal exposure to sevoflurane induces abnormal social behaviors and deficits in fear conditioning in mice. *ANESTHESIOLOGY* 2009; 110:628–37
9. Yuede CM, Wozniak DF, Creeley CE, Taylor GT, Olney JW, Farber NB: Behavioral consequences of NMDA antagonist-induced neuroapoptosis in the infant mouse brain. *PLoS One* 2010; 5:e11374
10. Kodama M, Satoh Y, Otsubo Y, Araki Y, Yonamine R, Masui K, Kazama T: Neonatal desflurane exposure induces more robust neuroapoptosis than do isoflurane and sevoflurane and impairs working memory. *ANESTHESIOLOGY* 2011; 115:979–91
11. Fredriksson A, Archer T, Alm H, Gordh T, Eriksson P: Neurofunctional deficits and potentiated apoptosis by neonatal NMDA antagonist administration. *Behav Brain Res* 2004; 153:367–76
12. Paule MG, Li M, Allen RR, Liu F, Zou X, Hotchkiss C, Hanig JP, Patterson TA, Slikker W Jr, Wang C: Ketamine anesthesia during the first week of life can cause long-lasting cognitive deficits in rhesus monkeys. *Neurotoxicol Teratol* 2011; 33:220–30
13. Viberg H, Pontén E, Eriksson P, Gordh T, Fredriksson A: Neonatal ketamine exposure results in changes in biochemical substrates of neuronal growth and synaptogenesis, and alters adult behavior irreversibly. *Toxicology* 2008; 249:153–9
14. Shen X, Dong Y, Xu Z, Wang H, Miao C, Soriano SG, Sun D, Baxter MG, Zhang Y, Xie Z: Selective anesthesia-induced neuroinflammation in developing mouse brain and cognitive impairment. *ANESTHESIOLOGY* 2013; 118:502–15
15. Yon JH, Daniel-Johnson J, Carter LB, Jevtovic-Todorovic V: Anesthesia induces neuronal cell death in the developing rat brain *via* the intrinsic and extrinsic apoptotic pathways. *Neuroscience* 2005; 135:815–27
16. Slikker W Jr, Zou X, Hotchkiss CE, Divine RL, Sadovova N, Twaddle NC, Doerge DR, Scallet AC, Patterson TA, Hanig JP, Paule MG, Wang C: Ketamine-induced neuronal cell death in the perinatal rhesus monkey. *Toxicol Sci* 2007; 98:145–58
17. Brambrink AM, Evers AS, Avidan MS, Farber NB, Smith DJ, Martin LD, Dissen GA, Creeley CE, Olney JW: Ketamine-induced neuroapoptosis in the fetal and neonatal rhesus macaque brain. *ANESTHESIOLOGY* 2012; 116:372–84
18. Ikonomidou C, Bosch F, Miksa M, Bittigau P, Vöckler J, Dikranian K, Tenkova TI, Stefovská V, Turski L, Olney JW: Blockade of NMDA receptors and apoptotic neurodegeneration in the developing brain. *Science* 1999; 283:70–4
19. Bailey CH, Kandel ER: Structural changes accompanying memory storage. *Annu Rev Physiol* 1993; 55:397–426
20. Lichtman JW, Colman H: Synapse elimination and indelible memory. *Neuron* 2000; 25:269–78
21. Bhatt DH, Zhang S, Gan WB: Dendritic spine dynamics. *Annu Rev Physiol* 2009; 71:261–82
22. Yang G, Pan F, Gan WB: Stably maintained dendritic spines are associated with lifelong memories. *Nature* 2009; 462:920–4
23. Xu T, Yu X, Perlik AJ, Tobin WF, Zweig JA, Tennant K, Jones T, Zuo Y: Rapid formation and selective stabilization of synapses for enduring motor memories. *Nature* 2009; 462:915–9
24. Liston C, Cichon JM, Jeanneteau F, Jia Z, Chao MV, Gan WB: Circadian glucocorticoid oscillations promote learning-dependent synapse formation and maintenance. *Nat Neurosci* 2013; 16:698–705

25. Yang G, Lai CS, Cichon J, Ma L, Li W, Gan WB: Sleep promotes branch-specific formation of dendritic spines after learning. *Science* 2014; 344:1173–8
26. Lai CS, Franke TF, Gan WB: Opposite effects of fear conditioning and extinction on dendritic spine remodelling. *Nature* 2012; 483:87–91
27. Yang G, Pan F, Parkhurst CN, Grutzendler J, Gan WB: Thinned-skull cranial window technique for long-term imaging of the cortex in live mice. *Nat Protoc* 2010; 5:201–8
28. Yang G, Chang PC, Bekker A, Blanck TJ, Gan WB: Transient effects of anesthetics on dendritic spines and filopodia in the living mouse cortex. *ANESTHESIOLOGY* 2011; 115:718–26
29. Grutzendler J, Kasthuri N, Gan WB: Long-term dendritic spine stability in the adult cortex. *Nature* 2002; 420:812–6
30. Buitrago MM, Schulz JB, Dichgans J, Luft AR: Short and long-term motor skill learning in an accelerated rotarod training paradigm. *Neurobiol Learn Mem* 2004; 81:211–6
31. Young C, Jevtovic-Todorovic V, Qin YQ, Tenkova T, Wang H, Labruyere J, Olney JW: Potential of ketamine and midazolam, individually or in combination, to induce apoptotic neurodegeneration in the infant mouse brain. *Br J Pharmacol* 2005; 146:189–97
32. De Roo M, Klauser P, Briner A, Nikonenko I, Mendez P, Dayer A, Kiss JZ, Muller D, Vutskits L: Anesthetics rapidly promote synaptogenesis during a critical period of brain development. *PLoS One* 2009; 4:e7043
33. Feng G, Mellor RH, Bernstein M, Keller-Peck C, Nguyen QT, Wallace M, Nerbonne JM, Lichtman JW, Sanes JR: Imaging neuronal subsets in transgenic mice expressing multiple spectral variants of GFP. *Neuron* 2000; 28:41–51
34. He S, Ma J, Liu N, Yu X: Early enriched environment promotes neonatal GABAergic neurotransmission and accelerates synapse maturation. *J Neurosci* 2010; 30:7910–6
35. Oye I, Paulsen O, Maurset A: Effects of ketamine on sensory perception: Evidence for a role of N-methyl-D-aspartate receptors. *J Pharmacol Exp Ther* 1992; 260:1209–13
36. Briner A, De Roo M, Dayer A, Muller D, Habre W, Vutskits L: Volatile anesthetics rapidly increase dendritic spine density in the rat medial prefrontal cortex during synaptogenesis. *ANESTHESIOLOGY* 2010; 112:546–56
37. Head BP, Patel HH, Niesman IR, Drummond JC, Roth DM, Patel PM: Inhibition of p75 neurotrophin receptor attenuates isoflurane-mediated neuronal apoptosis in the neonatal central nervous system. *ANESTHESIOLOGY* 2009; 110:813–25
38. Briner A, Nikonenko I, De Roo M, Dayer A, Muller D, Vutskits L: Developmental stage-dependent persistent impact of propofol anesthesia on dendritic spines in the rat medial prefrontal cortex. *ANESTHESIOLOGY* 2011; 115:282–93
39. Franks NP, Lieb WR: Molecular and cellular mechanisms of general anaesthesia. *Nature* 1994; 367:607–14
40. Yamakura T, Bertaccini E, Trudell JR, Harris RA: Anesthetics and ion channels: Molecular models and sites of action. *Annu Rev Pharmacol Toxicol* 2001; 41:23–51
41. Rudolph U, Antkowiak B: Molecular and neuronal substrates for general anaesthetics. *Nat Rev Neurosci* 2004; 5:709–20
42. Berridge MJ: Neuronal calcium signaling. *Neuron* 1998; 21:13–26
43. Hensch TK: Critical period plasticity in local cortical circuits. *Nat Rev Neurosci* 2005; 6:877–88
44. van Praag H, Kempermann G, Gage FH: Neural consequences of environmental enrichment. *Nat Rev Neurosci* 2000; 1:191–8
45. Nithianantharajah J, Hannan AJ: Enriched environments, experience-dependent plasticity and disorders of the nervous system. *Nat Rev Neurosci* 2006; 7:697–709
46. Sale A, Berardi N, Maffei L: Enrich the environment to empower the brain. *Trends Neurosci* 2009; 32:233–9
47. Shih J, May LD, Gonzalez HE, Lee EW, Alvi RS, Sall JW, Rau V, Bickler PE, Lalchandani GR, Yusupova M, Woodward E, Kang H, Wilk AJ, Carlston CM, Mendoza MV, Guggenheim JN, Schaefer M, Rowe AM, Stratmann G: Delayed environmental enrichment reverses sevoflurane-induced memory impairment in rats. *ANESTHESIOLOGY* 2012; 116:586–602
48. Xu HT, Pan F, Yang G, Gan WB: Choice of cranial window type for *in vivo* imaging affects dendritic spine turnover in the cortex. *Nat Neurosci* 2007; 10:549–51
